# Supplementary material
Source: publisher figshare collection journal article supplement (https://acs.figshare.com/ndownloader/files/5058043)
Supplement: Supplementary file 1 [file 5058043]

A

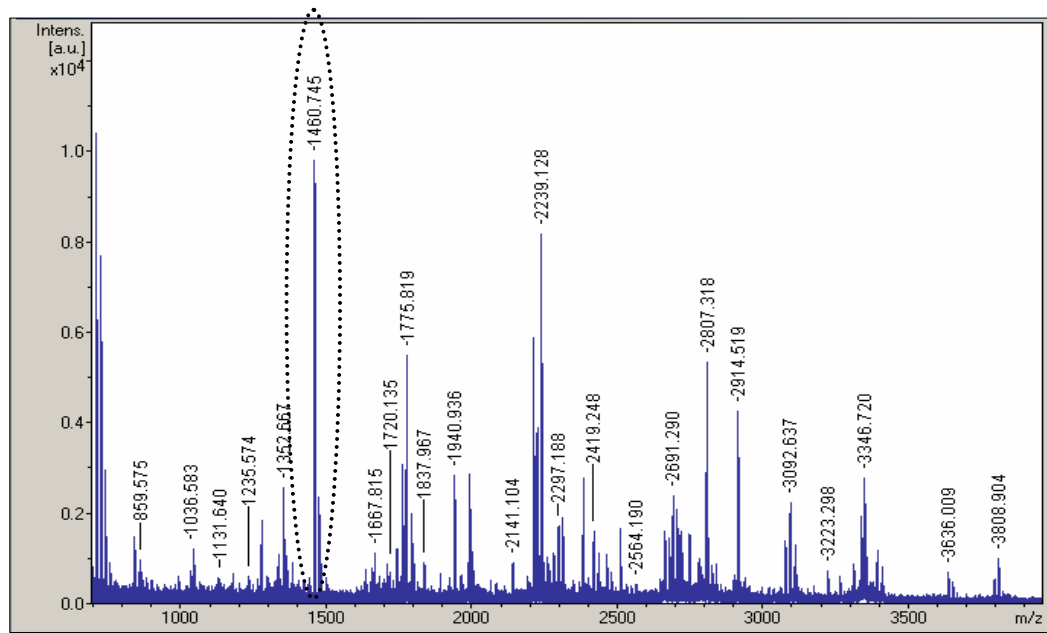

B

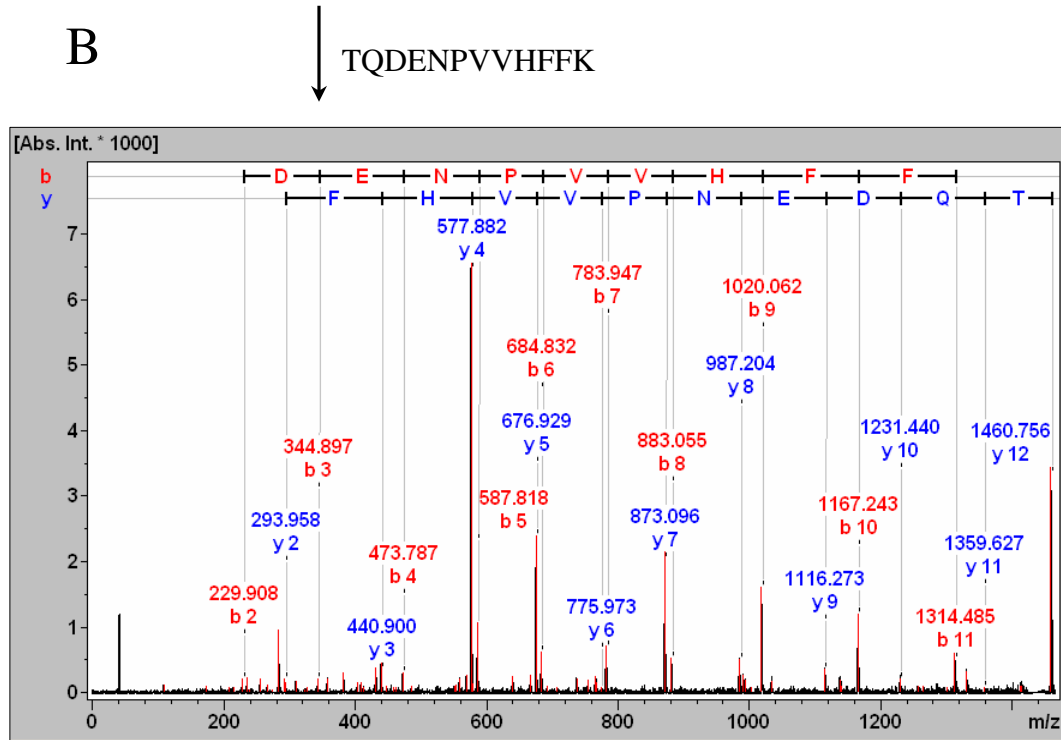

**Supporting Information Figure 6.** MS-TOF spectrum of splice isoform 7 of myelin basic protein (A) and LIFT-TOF/TOF spectrum of  $m/z$  1460.745 (B) that unambiguously assigned the identified sequence TQDENPVVHFFK to splice isoform 7 of myelin basic protein (Acc. No P04370-7)
